# Supplementary material for: Assessment of Chemical, Physico-Chemical and Sensory Properties of Low-Sodium Beef Burgers Formulated with Flours from Different Mushroom Types
Source: MDPI journal article supplement (doi:10.3390/foods12193591), 2023-09-27
Supplement: s1 [file s1]

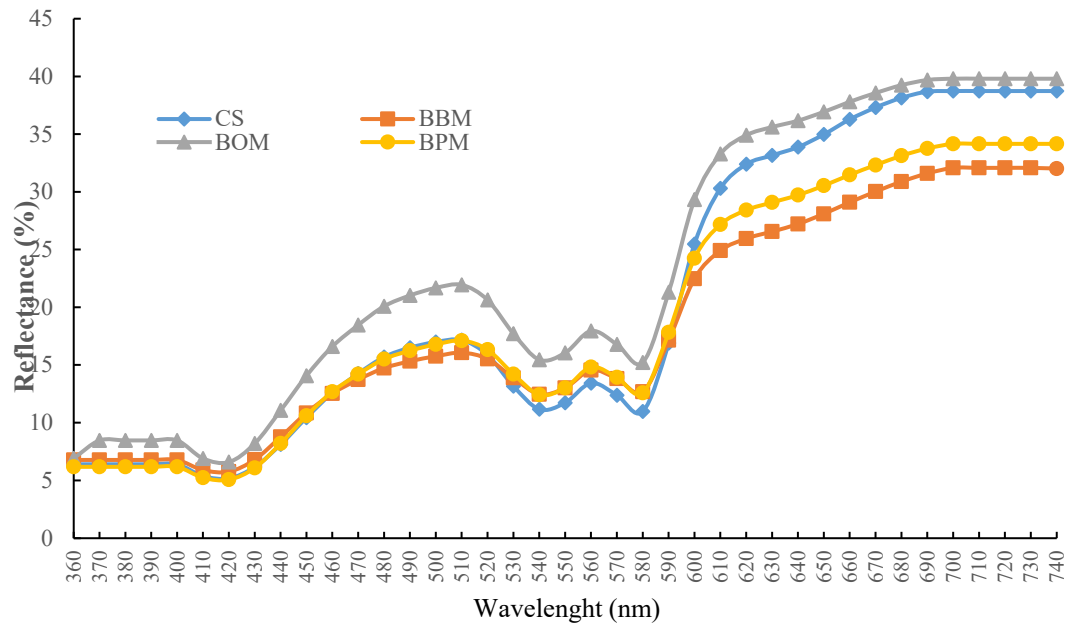

**Figure S1 .** Reflectance spectra (360-740 nm) of raw low-sodium chloride beef burgers where oyster mushroom flour, button mushroom flour and portobello mushroom flour were used as partial (75%) sodium chloride replacers.
